# Supplementary material for: A pulse-chasable reporter processing assay for mammalian autophagic flux with HaloTag
Source: eLife. 2022 Aug 8;11:e78923. doi: 10.7554/eLife.78923 (PMC9385206; doi:10.7554/eLife.78923)
Supplement: Supplementary file 1. [file elife-78923-supp1.xlsx]

## Sheet: Sheet1
Supplementary Table 1. Sequences of the primers used to construct the indicated plasmids.
Plasmid	Primer sequences
1. pMRX-IP-mGFP-rLC3B	ccggatctgccATCGATataAAGCTTgccaccATGGTGAGCAAGGGCGAGGAGCTG
	CTCGAGacccGAATTCccGGATCCcgagcctgaaccCTTGTACAGCTCGTCCATGCC
	ggttcaggctcgGGATCCggGAATTCgggtCCGTCCGAGAAGACCTTCAAACAGC
	ggaatttacgtaGCGGCCGCtCTCGAGaccccagggacatgacgacgtac
2. pMRX-IP-mRFP-rLC3B	ccggatctgccATCGATataAAGCTTgccaccATGGTGGCCTCCTCCGAGGACG
	CTCGAGacccGAATTCccGGATCCcgagcctgaaccGGCGCCGGTGGAGTGGCGGCCC
	ggttcaggctcgGGATCCggGAATTCgggtCCGTCCGAGAAGACCTTCAAACAGC
	ggaatttacgtaGCGGCCGCtTTACTCGAGaccccagggacatgacgacg
3. pMRX-IP-HaloTag7-rLC3B	ccggatctgccATCGATataAAGCTTgccaccATGGAAATCGGTACTGGCTTTCCATTCG
	CTCGAGacccGAATTCccGGATCCcgagcctgaaccACCGGAAATCTCCAGAGTAGAC
	ggttcaggctcgGGATCCggGAATTCgggtCCGTCCGAGAAGACCTTCAAACAGC
	ggaatttacgtaGCGGCCGCtTTACTCGAGaccccagggacatgacgacg
4. pMRX-IP-SNAP-rLC3B	ccggatctgccATCGATataAAGCTTgccaccATGGACAAAGACTGCGAAATG
	CTCGAGacccGAATTCccGGATCCcgagcctgaaccACCCAGCCCAGGCTTGCCC
	ggttcaggctcgGGATCCggGAATTCgggtCCGTCCGAGAAGACCTTCAAACAGC
	ggaatttacgtaGCGGCCGCtTTACTCGAGaccccagggacatgacgacg
5. pMRX-No-HaloTag7-rLC3B	ccggatctgccATCGATataAAGCTTgccaccATGGAAATCGGTACTGGCTTTCCATTCG
	CTCGAGacccGAATTCccGGATCCcgagcctgaaccACCGGAAATCTCCAGAGTAGAC
	ggttcaggctcgGGATCCggGAATTCgggtCCGTCCGAGAAGACCTTCAAACAGC
	ggaatttacgtaGCGGCCGCtTTACTCGAGaccccagggacatgacgacg
6. pMRX-No-HaloTag7-mGFP-rLC3B	ccggatctgccATCGATataAAGCTTgccaccATGGAAATCGGTACTGGCTTTCCATTCG
	CTCGAGacccGAATTCccGGATCCcgagcctgaaccACCGGAAATCTCCAGAGTAGAC
	CCGGTggttcaggctcgGGATCCgggGTGAGCAAGGGCGAGGAGCTG
	ggaatttacgtaGCGGCCGCtTTACTCGAGtcaTTACCCGAACGTCTCCTGGGAGGC
7. pMRX-No-HaloTag7-mGFP-rLC3B-mRFP	ccggatctgccATCGATataAAGCTTgccaccATGGAAATCGGTACTGGCTTTCCATTCG
	CTCGAGacccGAATTCccGGATCCcgagcctgaaccACCGGAAATCTCCAGAGTAGAC
	CCGGTggttcaggctcgGGATCCgggGTGAGCAAGGGCGAGGAGCTG
	ggaatttacgtaGCGGCCGCtTTACTCGAGtcaTTACCCGAACGTCTCCTGGGAGGC
	GGTCTATGCCTCCCAGGAGACGTTCGGGATGGTGGCCTCCTCCGAGGACGTCATC
	ggggggcggaatttacgtaGCGGCCGCtcaTTAGGCGCCGGTGGAGTGGCGGCCC
8. pMRX-IB-HaloTag7-mGFP	ccggatctgccATCGATataAAGCTTgccaccATGGAAATCGGTACTGGCTTTCCATTCG
	CTCGAGacccGAATTCccGGATCCcgagcctgaaccACCGGAAATCTCCAGAGTAGAC
	GGCTGTCTACTCTGGAGATTTCCGGTCTCGAGGTGAGCAAGGGCGAGGAGCTGTTC
	ggcggaatttacgtaGCGGCCGCtCTCGAGTTACTTGTACAGCTCGTCCATGCCGAGAG
9. pMRX-IB-HaloTag7-mGFP-KDEL	CTGccggatctgccATCGATataAAGCTTgccgccaccATGAAGTTATGCATATTACTGGCCGTCGTGGCCTTTGTTGG
	CTGGCCGTCGTGGCCTTTGTTGGCCTCTCGCTCGGATCCGAAATCGGTACTGGCTTTCCATTCG
	ggaatttacgtaGCGGCCGCtttaCTCGAGttaTCAGAGCTCATCTTTtGAATTCCCGGAAATCTCCAGAGTAGACAGCC
	GGCTGTCTACTCTGGAGATTTCCGGTCTCGAGGTGAGCAAGGGCGAGGAGCTGTTC
	GCtttaCTCGAGttaTCAGAGCTCATCTTTtGAATTCTTGTACAGCTCGTCCATGCCGAG
10. pMRX-IB-pSu9-HaloTag7-mGFP	ccggatctgccATCGATataAAGCTTgccgccaccATGGCCTCCACTCGTGTCCTCGCCTC
	gcctgaaccagagcccGAATTCccGGATCCGGTGGCGACCGGTGGATCaGAAGAGTAGGCGCGC
	GGCTGTCTACTCTGGAGATTTCCGGTCTCGAGGTGAGCAAGGGCGAGGAGCTGTTC
	ggcggaatttacgtaGCGGCCGCtCTCGAGTTACTTGTACAGCTCGTCCATGCCGAGAG
